# Supplementary material for: A visible light active, carbon–nitrogen–sulfur co-doped TiO2/g-C3N4 Z-scheme heterojunction as an effective photocatalyst to remove dye pollutants
Source: Royal Society of Chemistry journal article supplement (doi:10.1039/d1ra01890f), 2021-01-01
Supplement: d1ra01890f1.pdf [file d1ra01890f1.pdf]

Supporting Information

**Visible Light Active, Carbon-Nitrogen-Sulfur co-doped  
TiO<sub>2</sub>/g-C<sub>3</sub>N<sub>4</sub> Z-scheme Heterojunction as an Effective  
Photocatalyst to Remove Dye Pollutants**

*Zhen Huang<sup>a</sup>, Shuai Jia,<sup>a</sup> Jie Wei<sup>a</sup> and Ziqiang Shao<sup>\*a</sup>*

*a. Beijing Engineering Research Center of Cellulose and Its Derivatives,  
School of Materials Science and Engineering, Beijing Institute of Technology,  
Beijing 100081, P.R. China*

*Corresponding Author: Ziqiang Shao*

*\*Email: [shaoziqiang@263.net](mailto:shaoziqiang@263.net)*

## 1. Supplemental characterization analysis

The CNS-TiO<sub>2</sub>/g-C<sub>3</sub>N<sub>4</sub>-2 was applied to degrade MO dye under coexistence condition for evaluate its reusability, and the chemical stability was tested by XRD and FTIR (in Fig. S1). After five cycles, the degradation rate of CNS-TiO<sub>2</sub>/g-C<sub>3</sub>N<sub>4</sub>-2 on MO could still reach 95% in Fig. S1a, and the degradation rate of MO fluctuates slightly, which proves that the catalytic activity of CNS-TiO<sub>2</sub>/g-C<sub>3</sub>N<sub>4</sub>-2 is stable. According to Fig. S1b and c, the XRD patterns and FTIR spectrum of CNS-TiO<sub>2</sub>/g-C<sub>3</sub>N<sub>4</sub>-2 basically has no distinct changes after five degradation cycles. The above results indicate that the CNS-TiO<sub>2</sub>/g-C<sub>3</sub>N<sub>4</sub>-2 composite catalyst possesses excellent chemical stability and light corrosion resistance and can be used as a new material for organic pollutants to degrade wastewater.

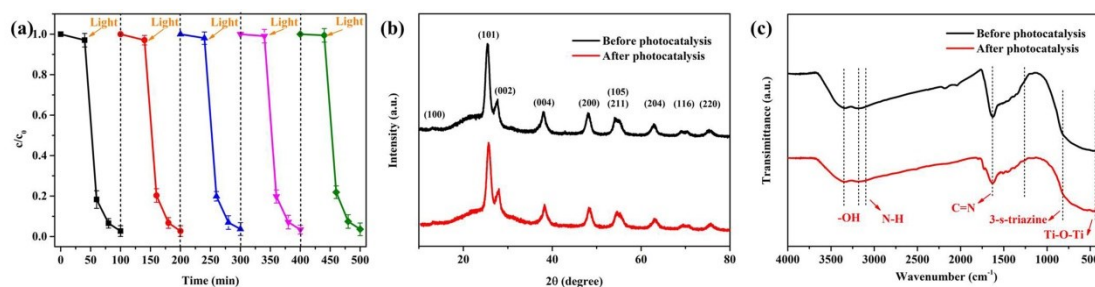

**Fig. S1.** (a) Recovery of CNS-TiO<sub>2</sub>/g-C<sub>3</sub>N<sub>4</sub>-2 for cyclic degradation of MO dyes, (b) XRD patterns and (c) FTIR spectra of CNS-TiO<sub>2</sub>/g-C<sub>3</sub>N<sub>4</sub>-2 before and after photocatalytic cycling five times.
